# Supplementary material for: Predicting Phenotypic Diversity and the Underlying Quantitative Molecular Transitions
Source: PubMed Central journal article supplement (PMC2661366; doi:10.1371/journal.pcbi.1000354), 2009-04-10
Supplement: pcbi.1000354.s002.pdf [file pcbi.1000354.s002.pdf]

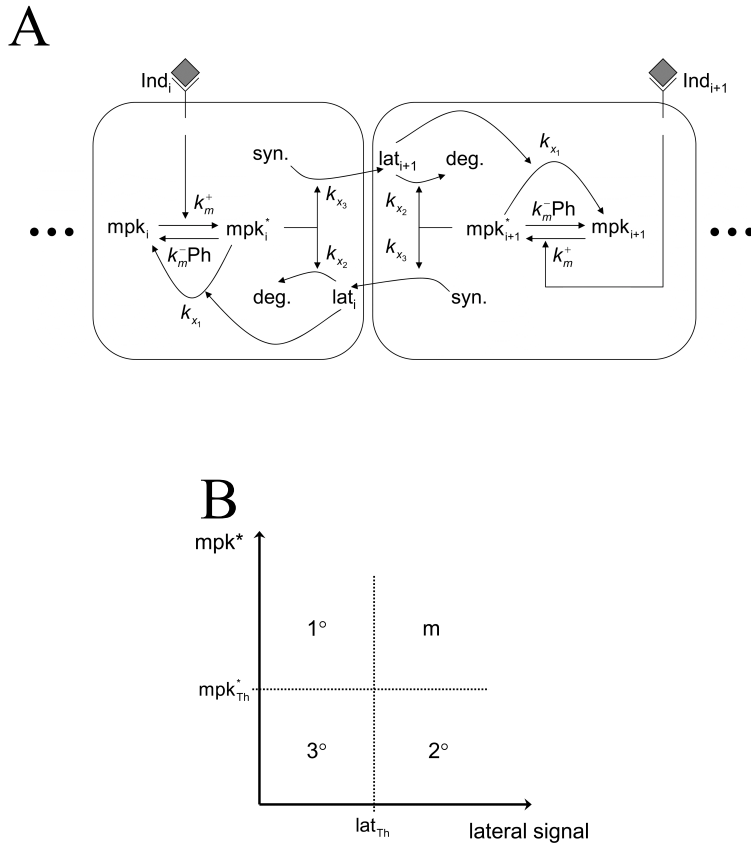

**Figure S1. (A) Model schematic of regulatory network governing multicellular patterning during *C. elegans* vulval development.** A pair of cells,  $i$  and  $i+1$ , within the VPC array are shown; in each cell  $i$  the inductive LIN-3 signal ( $\text{Ind}_i$ ) activates MPK-1 in each cell with rate constant  $k_m^+$ . The deactivation of MPK-1\* occurs at a rate determined by the expression level of constitutive phosphatases ( $\text{Ph}_T$ ) and the rate constant  $k_m^-$ . The lateral signal mediated by receptor LIN-12 is constitutively activated in each cell at rate  $k_n^+$  and degrades linearly with rate constant  $k_n^-$  (not depicted). The inductive signal upregulates the lateral signal in the neighboring cell with rate constant  $k_{x3}$  and downregulates it in the same cell with rate constant  $k_{x2}$ . In turn, the lateral signal in each cell deactivates MPK-1\* with rate constant  $k_{x1}$ . **(B) The fate plane for assigning cell fates.** Each cell can take one of four fates ( $1^\circ$ ,  $2^\circ$ ,  $3^\circ$ , m) in the model. The fate of a cell is assigned based on the level of  $\text{mpk}^*$  and lateral signal (lat) based on two thresholds ( $\text{mpk}^*_{\text{Th}}$  and  $\text{lat}_{\text{Th}}$ ).
