# Supplementary material for: Predicting Phenotypic Diversity and the Underlying Quantitative Molecular Transitions
Source: PubMed Central journal article supplement (PMC2661366; doi:10.1371/journal.pcbi.1000354), 2009-04-10
Supplement: pcbi.1000354.s004.pdf [file pcbi.1000354.s004.pdf]

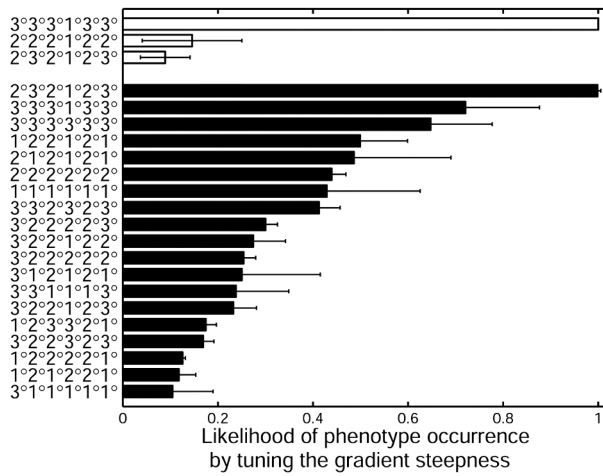

**Figure S3. Phenotypic diversity caused by quantitative changes in gradient steepness.** Mutant phenotypes with greatest likelihood of phenotype occurrence upon an increase (empty) and decrease (filled) in the steepness of the gradient in inductive signal ( $\Delta I$ ).
