# Supplementary material for: Predicting Phenotypic Diversity and the Underlying Quantitative Molecular Transitions
Source: PubMed Central journal article supplement (PMC2661366; doi:10.1371/journal.pcbi.1000354), 2009-04-10
Supplement: pcbi.1000354.s006.pdf [file pcbi.1000354.s006.pdf]

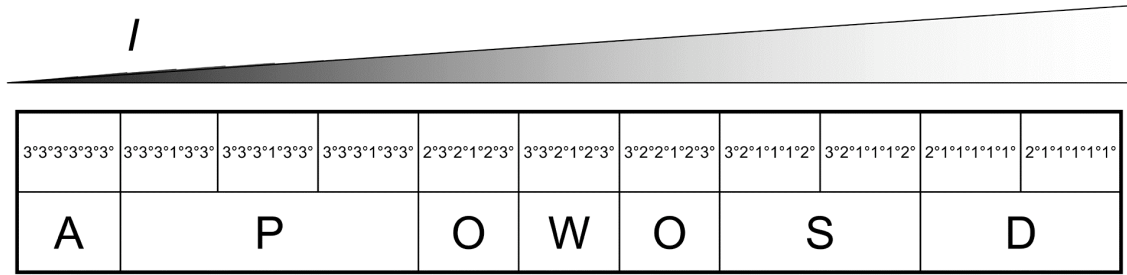

**Figure S5. An illustration of our word representation for the order of phenotypes that occurs as inductive signal is increased.** A sample wild-type (W) space point that leads to 3°3°3°3°3°3°, 3°3°3°1°3°3° and 2°3°2°1°2°3° phenotypes and 3°2°2°1°2°3°, 3°2°1°1°1°2° and 2°1°1°1°1°1° phenotypes upon decreasing and increasing morphogen levels, respectively, is translated to its corresponding word (APOWOSD) according to the procedure detailed in Materials and Methods.
