# Supplementary material for: Predicting Phenotypic Diversity and the Underlying Quantitative Molecular Transitions
Source: PubMed Central journal article supplement (PMC2661366; doi:10.1371/journal.pcbi.1000354), 2009-04-10
Supplement: pcbi.1000354.s007.pdf [file pcbi.1000354.s007.pdf]

| $mpk_i^* \leq mpk_{Th}^*$ | $lat_i \leq lat_{Th}$ | Fate |
|---------------------------|-----------------------|------|
| Yes                       | No                    | 1°   |
| No                        | Yes                   | 2°   |
| Yes                       | Yes                   | 3°   |
| No                        | No                    | m    |

**Table S1. Fate assignment based on threshold values.** For each of the six vulval precursor cells, the dimensional solution to model equations (7) is compared against the thresholds ( $mpk_{Th}^*$ ,  $lat_{Th}$ ) to determine its fate choice. This procedure leads to a six-cell pattern of fates. The values of the thresholds are varied to examine the robustness of model predictions to threshold settings (see Materials and Methods).
