# Supplementary material for: Predicting Phenotypic Diversity and the Underlying Quantitative Molecular Transitions
Source: PubMed Central journal article supplement (PMC2661366; doi:10.1371/journal.pcbi.1000354), 2009-04-10
Supplement: pcbi.1000354.s008.pdf [file pcbi.1000354.s008.pdf]

| Parameters           | Reference Value    | Units                                       |
|----------------------|--------------------|---------------------------------------------|
| $k_m^+, k_m^-$       | $2 \times 10^{-4}$ | $(\text{molec/cell})^{-1} \text{ min}^{-1}$ |
| $k_{x_2}$            | $2 \times 10^{-6}$ | $(\text{molec/cell})^{-1} \text{ min}^{-1}$ |
| $k_n^+$              | 130                | molec/cell/min                              |
| $k_{x_3}$            | 1300               | molec/cell/min                              |
| $k_n^-$              | 0.016              | $\text{min}^{-1}$                           |
| $k_{x_1}$            | 2.0                | $\text{min}^{-1}$                           |
| $K_{M_{\text{Ind}}}$ | 1000               | molec/cell                                  |
| $K_{M_{\text{kt}}}$  | 5000               | molec/cell                                  |
| Ind <sub>p6,p</sub>  | $10^4$             | molec/cell                                  |
| mpk <sub>T</sub>     | $10^4$             | molec/cell                                  |
| lat <sub>T</sub>     | $10^5$             | molec/cell                                  |
| Ph <sub>T</sub>      | $5 \times 10^3$    | molec/cell                                  |

**Table S2. The values of dimensional parameters used to determine the center values for the dimensionless parameters.** These values for the dimensional model parameters were used to compute the central values of the dimensionless parameters around which the parameter space was constructed. The rationale for these parameter values is provided in the Supporting Text.
