# Supplementary material for: Predicting Phenotypic Diversity and the Underlying Quantitative Molecular Transitions
Source: PubMed Central journal article supplement (PMC2661366; doi:10.1371/journal.pcbi.1000354), 2009-04-10
Supplement: pcbi.1000354.s009.pdf [file pcbi.1000354.s009.pdf]

| <b>Dimensionless Parameter</b> | <b>Center Value</b> | <b>Maximum Value</b>               | <b>Minimum Value</b>  |
|--------------------------------|---------------------|------------------------------------|-----------------------|
| $I$                            | 0.93                | $5.6 \times 10^2$                  | $1.5 \times 10^{-3}$  |
| $\Delta I$                     | $6 \times 10^{-3}$  | $3.6 \times 10^{-5}$<br>(steepest) | 1<br>(most shallow)   |
| $\chi$                         | 0.93                | $5.6 \times 10^2$                  | $1.5 \times 10^{-3}$  |
| $\lambda$                      | $5 \times 10^{-2}$  | 8.0                                | $2.9 \times 10^{-4}$  |
| $\phi$                         | 0.48                | $2.9 \times 10^2$                  | $8.0 \times 10^{-4}$  |
| $\theta$                       | 1.61                | $9.7 \times 10^2$                  | $2.7 \times 10^{-3}$  |
| $\kappa_M$                     | $6 \times 10^{-2}$  | 10.0                               | $3.6 \times 10^{-4}$  |
| $\kappa_L$                     | $4 \times 10^{-2}$  | 6.5                                | $2.32 \times 10^{-4}$ |

**Table S3. Range of values for dimensionless model parameters.**
