# Supplementary material for: Predicting Phenotypic Diversity and the Underlying Quantitative Molecular Transitions
Source: PubMed Central journal article supplement (PMC2661366; doi:10.1371/journal.pcbi.1000354), 2009-04-10
Supplement: pcbi.1000354.s010.pdf [file pcbi.1000354.s010.pdf]

| Phenotype         | Frequency              |
|-------------------|------------------------|
| 2° 2° 1° 3° 1° 3° | $1.21 \times 10^{-13}$ |
| m 2° 1° 1° m 1°   | $1.05 \times 10^{-13}$ |
| m 2° m 1° 2° 2°   | $8.56 \times 10^{-14}$ |
| 1° 2° 3° m 2° 2°  | $7.86 \times 10^{-14}$ |
| 1° 2° 1° m 2° 2°  | $6.18 \times 10^{-14}$ |
| 2° 2° 1° m 2° 1°  | $4.36 \times 10^{-14}$ |
| m 2° 1° m m 2°    | $3.48 \times 10^{-14}$ |
| 1° 2° 3° 2° 2° 2° | $3.46 \times 10^{-14}$ |
| m 2° 1° 1° 1° 1°  | $1.09 \times 10^{-14}$ |
| 3° 2° 1° 3° 3° 2° | $1.03 \times 10^{-14}$ |

| Phenotype         | Frequency              |
|-------------------|------------------------|
| 2° 2° 1° 3° 3° 2° | $5.12 \times 10^{-15}$ |
| 2° 3° 1° 3° 3° 3° | $2.36 \times 10^{-15}$ |
| 3° 2° m 2° m 2°   | $2.10 \times 10^{-15}$ |
| 2° 2° 1° 2° 3° 2° | $8.45 \times 10^{-16}$ |
| 3° 2° 1° 2° 3° 2° | $7.42 \times 10^{-16}$ |
| 2° 2° 1° 3° 3° 3° | $3.67 \times 10^{-16}$ |
| 2° 2° 1° 2° m 2°  | $3.38 \times 10^{-16}$ |
| 3° m 1° 1° 2° 1°  | $2.72 \times 10^{-16}$ |
| 2° 2° 1° 2° 2° 2° | $6.21 \times 10^{-18}$ |

**Table S4. List of phenotypes with PSO values that are two standard deviations below the mean.**
