# Supplementary material for: Predicting Phenotypic Diversity and the Underlying Quantitative Molecular Transitions
Source: PubMed Central journal article supplement (PMC2661366; doi:10.1371/journal.pcbi.1000354), 2009-04-10
Supplement: pcbi.1000354.s011.pdf [file pcbi.1000354.s011.pdf]

| Phenotype         | Frequency |
|-------------------|-----------|
| 3° 3° 3° 3° 3° 3° | 0.5458    |
| 3° 3° 3° 1° 3° 3° | 0.1293    |
| 1° 1° 1° 1° 1° 1° | 0.0967    |
| 3° 3° 1° 1° 1° 3° | 0.0949    |
| 3° 1° 1° 1° 1° 1° | 0.0538    |
| 2° 2° 2° 2° 2° 2° | 0.0146    |
| 3° 3° 2° 3° 2° 3° | 0.0109    |
| 3° 2° 2° 2° 2° 2° | 0.0065    |
| m m m m m m       | 0.0061    |
| 2° 2° 2° m 2° 2°  | 0.0053    |
| 2° 2° m m m 2°    | 0.0052    |
| 2° m m m m m      | 0.0032    |
| 3° 3° 2° 2° 2° 3° | 0.0028    |
| 3° 2° 2° m 2° 2°  | 0.0022    |
| 3° 3° 2° 1° 2° 3° | 0.0020    |
| 2° 2° 2° 3° 2° 2° | 0.0014    |
| 3° 2° 2° 3° 2° 2° | 0.0013    |

| Phenotype         | Frequency |
|-------------------|-----------|
| 2° 3° 1° 1° 1° 3° | 0.0011    |
| 2° 2° 3° 3° 3° 2° | 0.0011    |
| 2° 2° 3° 1° 3° 2° | 0.0011    |
| 3° 2° m m m 2°    | 0.0011    |
| 2° 2° 1° 1° 1° 2° | 0.0009    |
| 2° 3° 3° 1° 3° 3° | 0.0009    |
| 3° 2° 2° 2° 2° 3° | 0.0008    |
| 2° 2° 2° 1° 2° 2° | 0.0007    |
| 2° 3° 3° 3° 3° 3° | 0.0007    |
| 3° 1° 3° 1° 3° 1° | 0.0007    |
| 3° 2° 3° 3° 3° 2° | 0.0006    |
| 3° 2° 3° 1° 3° 2° | 0.0006    |
| 3° 2° 2° 1° 2° 2° | 0.0006    |
| 3° 3° 2° m° 2° 3° | 0.0006    |
| 2° 1° 1° 1° 1° 1° | 0.0005    |
| 1° m m m m 1°     | 0.0004    |
| 1° 3° 3° 1° 3° 1° | 0.0004    |

**Table S5. List of phenotypes with PSO values that are two standard deviations above the mean.**
