# Supplementary material for: Predicting Phenotypic Diversity and the Underlying Quantitative Molecular Transitions
Source: PubMed Central journal article supplement (PMC2661366; doi:10.1371/journal.pcbi.1000354), 2009-04-10
Supplement: pcbi.1000354.s012.pdf [file pcbi.1000354.s012.pdf]

| <b>Species</b>     | <b>Words assigned</b>                                   |
|--------------------|---------------------------------------------------------|
| <i>C. elegans</i>  | AW, APW, AWR, APWR, AWRD, APWRD, WRD, WR, PW, PWRD, PWR |
| <i>C. briggsae</i> | AMW, AWS, APWS, WSD, WS, PWS, PWS                       |
| <i>C. remanei</i>  | (A)NW*                                                  |

**Table S6. Characteristic words associated with each species.** These words are formed from letters designated for each phenotype in order to represent the experimentally observed, species-specific phenotype progressions along the inductive signal (*I*) axis.
